# Supplementary material
Source: PubMed Central journal article supplement (PMC7297058)
Supplement: NIHMS865965-supplement-3.pdf [file NIHMS865965-supplement-3.pdf]

## Supplementary Figure 2

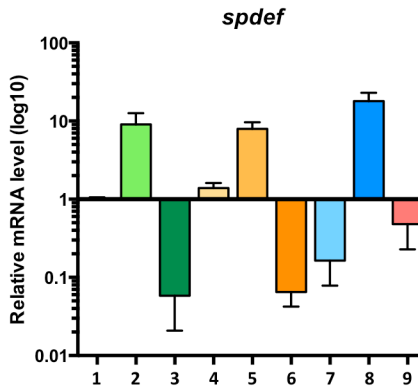

1. Colonic crypts isolated from *Atoh1<sup>GFP/GFP</sup>* mice
2. Colonic *Atoh1+* cells sorted from *Atoh1<sup>GFP/GFP</sup>* mice
3. Colonic *Atoh1-* cells sorted from *Atoh1<sup>GFP/GFP</sup>* mice
4. Ileal crypts isolated from *Atoh1<sup>GFP/GFP</sup>* mice
5. Ileal *Atoh1+* cells sorted from *Atoh1<sup>GFP/GFP</sup>* mice
6. Ileal *Atoh1-* cells sorted from *Atoh1<sup>GFP/GFP</sup>* mice
7. Ileal GFP+ cells sorted from *Fabp1<sup>Cre</sup>; Atoh1<sup>lox/lox</sup>; Rosa26<sup>tta-ires-EGFP</sup>* mice  
(mice were given 2mg/ml tetracycline in water for 5 consecutive days)
8. Ileal GFP+ cells sorted from *Fabp1<sup>Cre</sup>; Atoh1<sup>lox/lox</sup>; Rosa26<sup>tta-ires-EGFP</sup>; TRE-Spdef* mice  
(mice were given 2mg/ml tetracycline in water for 5 consecutive days)
9. Ileal GFP+ cells sorted from *Lgr5<sup>CreERT2</sup>; β-catenin<sup>exon3</sup>; Rosa26<sup>tta-ires-EGFP</sup>; TRE-Spdef* mice  
(mice were given an intraperitoneal injection of 1 mg/mouse tamoxifen and then 2mg/ml tetracycline in water for 5 consecutive days)
