# Supplementary material
Source: PubMed Central journal article supplement (PMC7297058)
Supplement: NIHMS865965-supplement-8.pdf [file NIHMS865965-supplement-8.pdf]

## Supplementary Table 2

### List of primers used for constructs

| Expression Vector | Construct Name     | Primers                                          | Sequence 5' ----- 3'                                                                   | PCR Template           |
|-------------------|--------------------|--------------------------------------------------|----------------------------------------------------------------------------------------|------------------------|
| pCS2MT            | MYC-mβ-catenin Δ1  | MYC-mCTNNB1 F1 XhoI<br>MYC-mCTNNB1 R450 XbaI     | TGCCTCGAGATGGCTACTCAAGCT<br>GGATCTAGATCATGTGGCAAGTCCGC                                 | pCS2MT mβ-catenin WT   |
| pCS2MT            | MYC-mβ-catenin Δ2  | MYC-mCTNNB1 F1 XhoI<br>MYC-mCTNNB1 R828 XbaI     | TGCCTCGAGATGGCTACTCAAGCT<br>GGATCTAGATCAAGTAGGCGCAC                                    | pCS2MT mβ-catenin WT   |
| pCS2MT            | MYC-mβ-catenin Δ3  | MYC-mCTNNB1 F1 XhoI<br>MYC-mCTNNB1 R1167 XbaI    | TGCCTCGAGATGGCTACTCAAGCT<br>GGATCTAGATCATGAAAGTTTCTGAG                                 | pCS2MT mβ-catenin WT   |
| pCS2MT            | MYC-mβ-catenin Δ4  | MYC-mCTNNB1 F451 XhoI<br>MYC-mCTNNB1 R1998 XbaI  | TGCCTCGAGCGTGCAATTCCT<br>GGATCTAGATCACTTGCTCCTCAGACAT                                  | pCS2MT mβ-catenin WT   |
| pCS2MT            | MYC-mβ-catenin Δ5  | MYC-mCTNNB1 F1198 XhoI<br>MYC-mCTNNB1 R1998 XbaI | TACCTCGAGGGCCTCCTTGGG<br>GGATCTAGATCACTTGCTCCTCAGACAT                                  | pCS2MT mβ-catenin WT   |
| pCS2MT            | MYC-mβ-catenin Δ6  | MYC-mCTNNB1 F1465 XhoI<br>MYC-mCTNNB1 R2346 XbaI | TGCCTCGAGTATGGACTGCCT<br>GGATCTAGATTACAGGTCAGTATCAAA                                   | pCS2MT mβ-catenin WT   |
| pCS2MT            | MYC-mβ-catenin Δ7  | MYC-mCTNNB1 F2002 XhoI<br>MYC-mCTNNB1 R2346 XbaI | TGCCTCGAGCAGGATTACAAGAAG<br>GGATCTAGATTACAGGTCAGTATCAAA                                | pCS2MT mβ-catenin WT   |
| pEGFP-C2          | GFP-mSPDEF ΔN1     | GFP-mSPDEF F72 EcoRI<br>GFP-mSPDEF R978 BamHI    | TTCGAATTCGAAACAGGGACGGAG<br>GGTGGATCCTCAGACTGGATGCAC                                   | pEGFP-C2 mSPDEF WT     |
| pEGFP-C2          | GFP-mSPDEF ΔN2     | GFP-mSPDEF F162 EcoRI<br>GFP-mSPDEF R978 BamHI   | TTCGAATTCGTCTGCTTTCTAC<br>GGTGGATCCTCAGACTGGATGCAC                                     | pEGFP-C2 mSPDEF WT     |
| pEGFP-C2          | GFP-mSPDEF ΔN3     | GFP-mSPDEF F207 EcoRI<br>GFP-mSPDEF R978 BamHI   | TTCGAATTCAGCAGCTGGGTCGCC<br>GGTGGATCCTCAGACTGGATGCAC                                   | pEGFP-C2 mSPDEF WT     |
| pEGFP-C2          | GFP-mSPDEF ΔN4     | GFP-mSPDEF F252 EcoRI<br>GFP-mSPDEF R978 BamHI   | TTCGAATTCACCCGGAGGAGCCC<br>GGTGGATCCTCAGACTGGATGCAC                                    | pEGFP-C2 mSPDEF WT     |
| pEGFP-C2          | GFP-mSPDEF ΔN5     | GFP-mSPDEF F297 EcoRI<br>GFP-mSPDEF R978 BamHI   | TTCGAATTCCTGGGAGCACGTTG<br>GGTGGATCCTCAGACTGGATGCAC                                    | pEGFP-C2 mSPDEF WT     |
| pEGFP-C2          | GFP-mSPDEF ΔN6     | GFP-mSPDEF F345 EcoRI<br>GFP-mSPDEF R978 BamHI   | TTCGAATTCATGGTTGTGGGCGAG<br>GGTGGATCCTCAGACTGGATGCAC                                   | pEGFP-C2 mSPDEF WT     |
| pEGFP-C2          | GFP-mSPDEF ΔC2     | GFP-mSPDEF F1 EcoRI<br>GFP-mSPDEF R714 BamHI     | TTCGAATTCATGGGCAGTGCCAGC<br>GGTGGATCCGGGCTGCCCGGAGCA                                   | pEGFP-C2 mSPDEF WT     |
| pEGFP-C2          | GFP-mSPDEF ΔC1     | GFP-mSPDEF F1 EcoRI<br>GFP-mSPDEF R621 BamHI     | TTCGAATTCATGGGCAGTGCCAGC<br>GGTGGATCCCCCTCCTTCATCCA                                    | pEGFP-C2 mSPDEF WT     |
| pEGFP-C2          | GFP-mSPDEF ΔNC1    | GFP-mSPDEF F207 EcoRI<br>GFP-mSPDEF R621 BamHI   | TTCGAATTCAGCAGCTGGGTCGCC<br>GGTGGATCCCCCTCCTTCATCCA                                    | pEGFP-C2 mSPDEF WT     |
| pEGFP-C2          | GFP-mSPDEF ΔNC2    | GFP-mSPDEF F207 EcoRI<br>GFP-mSPDEF R714 BamHI   | TTCGAATTCAGCAGCTGGGTCGCC<br>GGTGGATCCGGGCTGCCCGGAGCA                                   | pEGFP-C2 mSPDEF WT     |
| pCMV7.1           | Flag-NLS-hSPDEF Δ1 | hSPDEF-NLS-F1 EcoRI<br>hSPDEF-R744 BamHI         | AATGAATTCGCCCCCAAGAAAAGAGAAAGGTGATGGGCAGCGCCA<br>AATGGATCCTGAGGGCTGCCCGGAGCATGATGAGTCC | pCMV7.1 Flag hSPDEF WT |
| pCMV7.1           | Flag-NLS-hSPDEF Δ2 | hSPDEF-NLS-F210 EcoRI<br>hSPDEF-R744 BamHI       | AATGAATTCGCCCCCAAGAAAAGAGAAAGGTGATGGGCAGCGCCA<br>AATGGATCCTGAGGGCTGCCCGGAGCATGATGAGTCC | pCMV7.1 Flag hSPDEF WT |
| pCMV7.1           | Flag-NLS-hSPDEF Δ3 | hSPDEF-NLS-F729 EcoRI<br>hSPDEF-R1005 BamHI      | AATGAATTCGCCCCCAAGAAAAGAGAAAGGTGATGGGCAGCGCCA<br>AATGGATCCTGAGGGCTGCCCGGAGCATGATGAGTCC | pCMV7.1 Flag hSPDEF WT |
