# Supplementary material
Source: PubMed Central journal article supplement (PMC7297058)
Supplement: NIHMS865965-supplement-9.pdf [file NIHMS865965-supplement-9.pdf]

## Supplementary Table 3

### List of primers used for SPDEF and $\beta$ -catenin ChIP-qPCR

| Primer      | Sequence 5' ----- 3'        | Note        |
|-------------|-----------------------------|-------------|
| hMMP20 F    | TTCCTTCTAGTTTGCTTCACTGGAAA  |             |
| hMMP20 R    | CATGGTTGATTCTTGCTTCTGAC     |             |
| hRAD51L1 F  | TGGAACAAAGCCATACATCCAATC    |             |
| hRAD51L1 R  | CCAAAAGAACCACATTTAGAGGAAGG  |             |
| hAXIN2 F    | TGCTTGCCACTGTTTGAAGTCAGC    |             |
| hAXIN2 R    | GCCATGAACCCTTTTGTCTTGC      |             |
| hHDAC4 F    | TGAAAGCACCGCTCATTCTCTGTG    |             |
| hHDAC4 R    | GCTGCCTTAACTTGGCATCAAAGG    |             |
| hWNT16 F    | CCAGTCATGGTAGAGGAAGCACCA    |             |
| hWNT16 R    | TGAATGCAGGCAATGTGGTTTAGA    |             |
| hRNF43 F    | GACTTTTGGGGTGGGTGGGAAATA    |             |
| hRNF43 R    | TCAACTCTCTGGATAAGGTGGAATAGC |             |
| hYAP1 F     | TCCAGTGTTGATTAGAGGTGGGGGTA  |             |
| hYAP1 R     | GGGGGAAGGAAAGAAAGAGCAAAA    |             |
| hMYC 3'EN F | GCTCAGTCTTTGCCCTTTGTGG      | 3' enhancer |
| hMYC 3'EN R | AACACCTCCCGATTCCAAGTG       | 3' enhancer |
| hMYC PRO F  | GGAAGGTATCCAATCCAGATAGC     | promoter    |
| hMYC PRO R  | ATAGAGGCATAAGGAGGAAAACG     | promoter    |
| hCCND1 F    | CTTCCTAGTTGTCCCCTACTGC      |             |
| hCCND1 R    | CCCTGTAGTCCGTTTTTCATAG      |             |
| hEPHB2 F    | GTTTGAAGCAAGGTAGGTAGAGG     |             |
| hEPHB2 R    | TGTGATGGAGGTACAAGTTAGGC     |             |
| hLGR5 F     | GTTTTAGTCTGCATCCCTTGC       |             |
| hLGR5 R     | GGTTGCCACATTTAATCACG        |             |
| hCDK6 F     | CATACACGACACTATTTCCAAC      |             |
| hCDK6 R     | TAGTCCTGAGCTGGATTTTGAAG     |             |
