# Supplementary material
Source: PubMed Central journal article supplement (PMC7297058)
Supplement: NIHMS865965-supplement-10.pdf [file NIHMS865965-supplement-10.pdf]

## Supplementary Table 4

### List of primers used for RT-qPCR

| Primer   | Sequence 5' ----- 3'    | Note      |
|----------|-------------------------|-----------|
| hGAPDH F | TTGAGGTCAATGAAGGGGTC    | Figure 7E |
| hGAPDH R | GAAGGTGAAGGTCGGAGTCA    | Figure 7E |
| hCCND1 F | GGCGGATTGGAAATGAACTT    | Figure 7E |
| hCCND1 R | TCCTCTCCAAAATGCCAGAG    | Figure 7E |
| hMYC F   | CACCGAGTCGTAGTCGAGGT    | Figure 7E |
| hMYC R   | TTTCGGGTAGTGAAAACCA     | Figure 7E |
| hAXIN2 F | CTGGTGCAAAGACATAGCCA    | Figure 7E |
| hAXIN2 R | AGTGTGAGGTCCACGGAAAC    | Figure 7E |
| hYAP1 F  | ACGTTTCATCTGGGACAGCAT   | Figure 7E |
| hYAP1 R  | GTTGGGAGATGGCAAAGACA    | Figure 7E |
| hEPHB2 F | TTGATGGGACAGTGGGTACA    | Figure 7E |
| hEPHB2 R | CTTCGAGGCCGTTGAGAAT     | Figure 7E |
| mGapdh F | AGGTCGGTGTGAACGGATTTG   | Figure 3F |
| mGapdh R | TGTAGACCATGTAGTTGAGGTCA | Figure 3F |
| mSpdef F | AAGGCAGCATCAGGAGCAATG   | Figure 3F |
| mSpdef R | CTGTCAATGACGGGACACTG    | Figure 3F |
| mAtoh1 F | GAGTGGGCTGAGGTAAAAGAGT  | Figure 3F |
| mAtoh1 R | GGTCGGTGCTATCCAGGAG     | Figure 3F |
| mMuc2 F  | ATGCCACCTCCTCAAAGAC     | Figure 3F |
| mMuc2 R  | GTAGTTTCCGTTGGAACAGTGAA | Figure 3F |
| mDefa1 F | CCTACTCTTTGCCCTTGTC     | Figure 3F |
| mDefa1 R | CTCATGCTCGTCTTGTCTC     | Figure 3F |
| mLyz1 F  | GGATCAATTGCACTGCTCTG    | Figure 3F |
| mLyz1 R  | CAGTTCCGAATATACTGGGAC   | Figure 3F |
| mChga F  | CCCACTGCAGCATCCAGTT     | Figure 3F |
| mChga R  | AGTCCGACTGACCATCATCTTTC | Figure 3F |
