# Supplementary material
Source: PubMed Central journal article supplement (PMC7297058)

# Supplementary Figure 3

## A

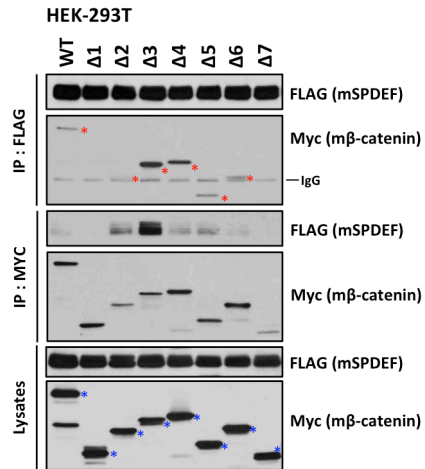

## B

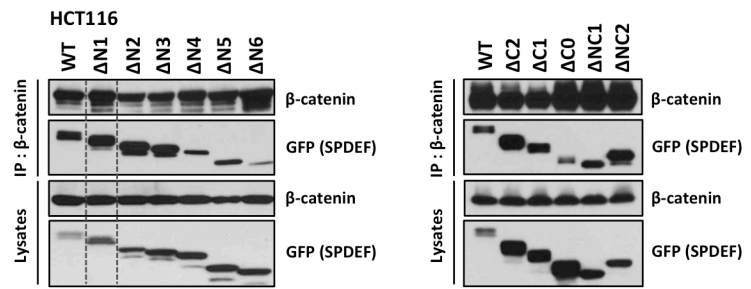

Supplement: NIHMS865965-supplement-4.pdf [file NIHMS865965-supplement-4.pdf]
